# Supplementary material
Source: HighWire-hosted journal article supplement (https://bmjopen.bmj.com/content/15/5/e095769)
Supplement: inline-supplementary-material-1 [file inline-supplementary-material-1.pdf]

Supplementary Table 1. SPIRIT outcome schedule

| Phenotyping variables | BEHAVIORAL WHEEL FRAMEWORK |       |    |           |        |       |        |            | MEASUREMENTS    |    |                     |    |                                 |    |                  |    |
|-----------------------|----------------------------|-------|----|-----------|--------|-------|--------|------------|-----------------|----|---------------------|----|---------------------------------|----|------------------|----|
|                       | Context                    |       |    |           | Skill  |       | Drives |            | Cross sectional |    |                     |    | Longitudinal                    |    |                  |    |
|                       |                            |       |    |           |        |       |        |            | Self reporting  |    | Clinical Assessment |    | Ecological momentary assessment |    | Time Series Data |    |
|                       | Physical                   | Urban | Al | Political | Social | Motor | C      | Reflective | M               | TP | M                   | TP | M                               | TP | M                | TP |
| Age                   | x                          |       |    |           |        |       |        |            | GQ              | T0 |                     |    |                                 |    |                  |    |
| Gender                | x                          |       |    |           |        |       |        |            | GQ              | T0 |                     |    |                                 |    |                  |    |
| Marital Status        |                            | x     |    |           |        |       |        |            | GQ              | T0 |                     |    |                                 |    |                  |    |
| Retirement            |                            |       | x  |           |        |       |        |            | GQ              | T0 |                     |    |                                 |    |                  |    |
| Education             |                            | x     |    |           |        |       |        |            | GQ              | T0 |                     |    |                                 |    |                  |    |
| Living arrangement    |                            | x     |    |           |        |       |        |            | GQ              | T0 |                     |    |                                 |    |                  |    |
| Income                |                            |       | x  |           |        |       |        |            | GQ              | T0 |                     |    |                                 |    |                  |    |
| Driving status        |                            |       |    |           |        | x     |        |            | GQ              | T0 |                     |    |                                 |    |                  |    |
| Urbanisation          |                            | x     |    | x         |        |       |        |            | GQ              | T0 |                     |    |                                 |    |                  |    |
| Living status         |                            |       | x  |           |        |       |        |            | GQ              | T0 |                     |    |                                 |    |                  |    |

|                            |   |   |   |   |   |   |  |  |                                 |    |                                 |    |   |    |        |    |
|----------------------------|---|---|---|---|---|---|--|--|---------------------------------|----|---------------------------------|----|---|----|--------|----|
| Access to facilities       |   |   | x | x |   |   |  |  | GQ                              | T0 |                                 |    | X | TR |        |    |
| Smoking                    | x | x |   |   |   |   |  |  | GQ                              | T0 |                                 |    |   |    |        |    |
| Mobility issues            |   |   |   |   |   | x |  |  | GQ                              | T0 |                                 |    |   |    |        |    |
| Self rated health          | x |   |   |   |   |   |  |  | GQ                              | T0 |                                 |    | X | TR |        |    |
| Participation/volunteering |   | x |   |   |   |   |  |  | GQ                              | T0 |                                 |    |   |    |        |    |
| Pain                       | x |   |   |   |   |   |  |  | NRS                             | T0 |                                 |    | X | TR |        |    |
| QoL                        | x | x | x | x |   |   |  |  | WHOQoL                          | T0 |                                 |    | X | TR |        |    |
| Depression                 |   |   |   |   | x |   |  |  | Geriatric Depression Scale      | T0 |                                 |    |   |    |        |    |
| Stress                     |   |   |   |   | x |   |  |  | Perceived Stress Scale          | T0 |                                 |    | X | TR | Garmin | TC |
| Cognitive characteristics  |   |   |   |   | x |   |  |  | Cognitive Flexibility Inventory | T0 | Reaction time + Impulse control | T0 |   |    |        |    |

|                         |   |  |  |  |   |   |  |  |                                       |                  |      |    |   |    |        |    |
|-------------------------|---|--|--|--|---|---|--|--|---------------------------------------|------------------|------|----|---|----|--------|----|
| Subjective wellbeing    |   |  |  |  | x |   |  |  | Satisfaction with Life Scale (Diener) | T0               |      |    | X | TR |        |    |
| Anxiety                 |   |  |  |  | x |   |  |  | GAS - 10                              | T0               |      |    | X | TR |        |    |
| PA                      | x |  |  |  |   | x |  |  | IPAQ                                  | T0<br>T1/2<br>T2 |      |    | X | TR | Garmin | TC |
| Steps                   |   |  |  |  |   | x |  |  |                                       |                  |      |    |   |    | Garmin | TC |
| Calories                |   |  |  |  |   | x |  |  |                                       |                  |      |    |   |    | Garmin | TC |
| HR                      |   |  |  |  |   | x |  |  |                                       |                  |      |    |   |    | Garmin | TC |
| Number of Floors        |   |  |  |  |   | x |  |  |                                       |                  |      |    |   |    | Garmin | TC |
| MVPA                    |   |  |  |  |   | x |  |  |                                       |                  |      |    |   |    | Garmin | TC |
| Cardiometabolic outcome |   |  |  |  |   | x |  |  |                                       |                  | 6MWT | T0 |   |    | Garmin | TC |
| Blood Pressure          |   |  |  |  |   | x |  |  |                                       |                  | BP   | T0 |   |    | Garmin |    |
| Body Battery            |   |  |  |  |   | x |  |  |                                       |                  |      |    |   |    | Garmin | TC |
| Sleep                   |   |  |  |  |   | x |  |  | Geriatric Sleep Questionnaire (GSQ-6) | T0               |      |    | X | TR | Garmin | TC |

|                            |  |  |  |  |  |   |  |   |                                   |                                       |    |   |    |  |  |
|----------------------------|--|--|--|--|--|---|--|---|-----------------------------------|---------------------------------------|----|---|----|--|--|
| Muscle strength            |  |  |  |  |  | x |  |   |                                   | Grip Force (hand held) - Q - strength | T0 |   |    |  |  |
| Weight                     |  |  |  |  |  | x |  |   |                                   | scale                                 | T0 |   |    |  |  |
| Height                     |  |  |  |  |  | x |  |   |                                   | Stadio measure                        | T0 |   |    |  |  |
| Abdominical Circumferenc e |  |  |  |  |  | x |  |   |                                   | Tape measure                          | T0 |   |    |  |  |
| Flexibility                |  |  |  |  |  | x |  |   |                                   | Hamstrings-stretch                    | T0 |   |    |  |  |
| Balance                    |  |  |  |  |  | x |  |   |                                   | Kinvent                               | T0 |   |    |  |  |
| Emotional loneliness       |  |  |  |  |  | x |  |   | De Jong Gierveld Loneliness scale | T0                                    |    | X | TR |  |  |
| Social identity and role   |  |  |  |  |  |   |  | x | Exercise Identity scale           | T0                                    |    | X | TR |  |  |
| Self efficacy              |  |  |  |  |  |   |  | x | SCI Exercise Self-Efficacy        | T0                                    |    | X | TR |  |  |

|                  |  |  |  |  |  |  |   |  |                                                 |    |  |  |   |    |  |  |
|------------------|--|--|--|--|--|--|---|--|-------------------------------------------------|----|--|--|---|----|--|--|
|                  |  |  |  |  |  |  |   |  | Scale (ESES)                                    |    |  |  |   |    |  |  |
| Motivation<br>PA |  |  |  |  |  |  | x |  | Exercise<br>Motivations<br>Inventory<br>(EMI-2) | T0 |  |  | X | TR |  |  |

\*T0 = baseline level, TR = random time TC= continuous monitoring
